# Supplementary material for: Unexpected characteristics of convective downdrafts in the upper-levels of tropical deep convective clouds
Source: Copernicus journal article supplement (doi:10.5194/egusphere-2025-1637), 2025-04-17
Supplement: Supplementary file 1 [file egusphere-2025-1637-supplement.pdf]

Supplement to

# Unexpected characteristics of convective downdrafts in the upper-levels of tropical deep convective clouds

Sreehari Kizhuveetil<sup>1</sup>, Jordi Vila-Guerau de Arellano<sup>1</sup>, Martina Krämer<sup>2,3</sup>, Armin Afchine<sup>2</sup>, Luiz A. T. Machado<sup>4</sup>, Martin Zöger<sup>5</sup>, and Wiebke Frey<sup>1</sup>

<sup>1</sup>Meteorology and Air Quality group, Wageningen University and Research (WUR), P.O. Box 47 6700 AA, Wageningen, the Netherlands

<sup>2</sup>Institute of Climate and Energy Systems (ICE-4), Research Center Jülich, Jülich, Germany <sup>3</sup>Institute for Atmospheric Physics (IPA), Johannes Gutenberg University Mainz, Mainz, Germany

<sup>4</sup>Instituto de Física, Universidade de São Paulo, São Paulo, Brazil

<sup>5</sup>Institute for Flight Experiments, German Aerospace Center, DLR, Oberpfaffenhofen, Germany  
Correspondence: Sreehari Kizhuveetil (sreehari.kizhuveetil@wur.nl)

## Draft statistics with a lower diameter threshold

This section contains analysis with a draft diameter threshold of 100m. A detailed discussion is presented in Section 4.1 of the main manuscript.

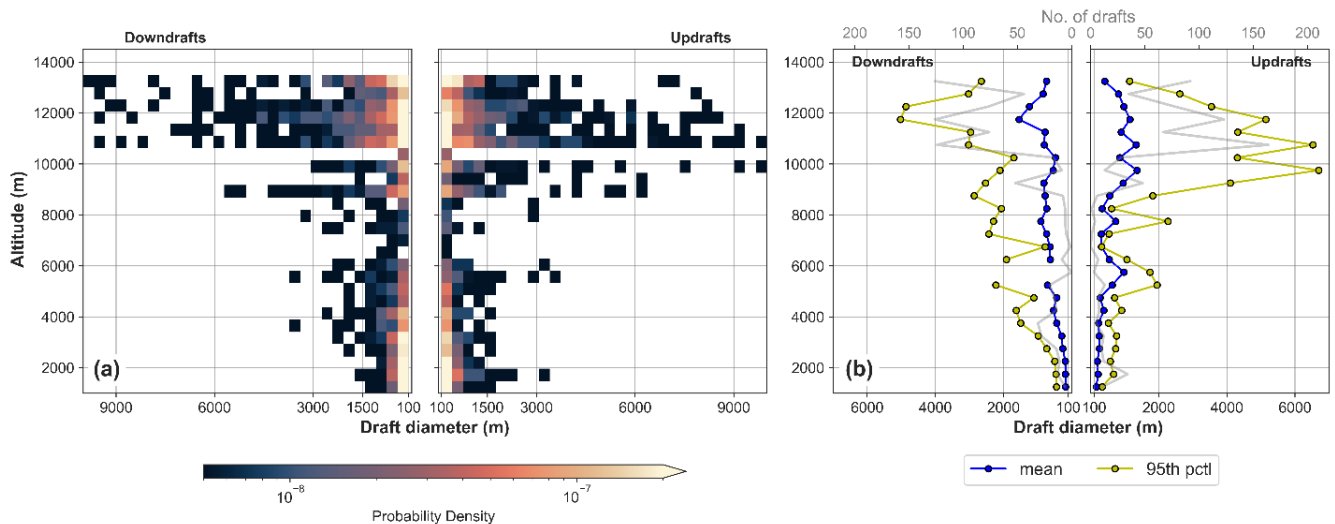

Figure S1: Altitude-wise draft diameter statistics of all in-cloud drafts with width > 100 m. (a) Probability Density Function (b) mean (blue) and 95<sup>th</sup> percentile (yellow) values of the diameter of drafts.

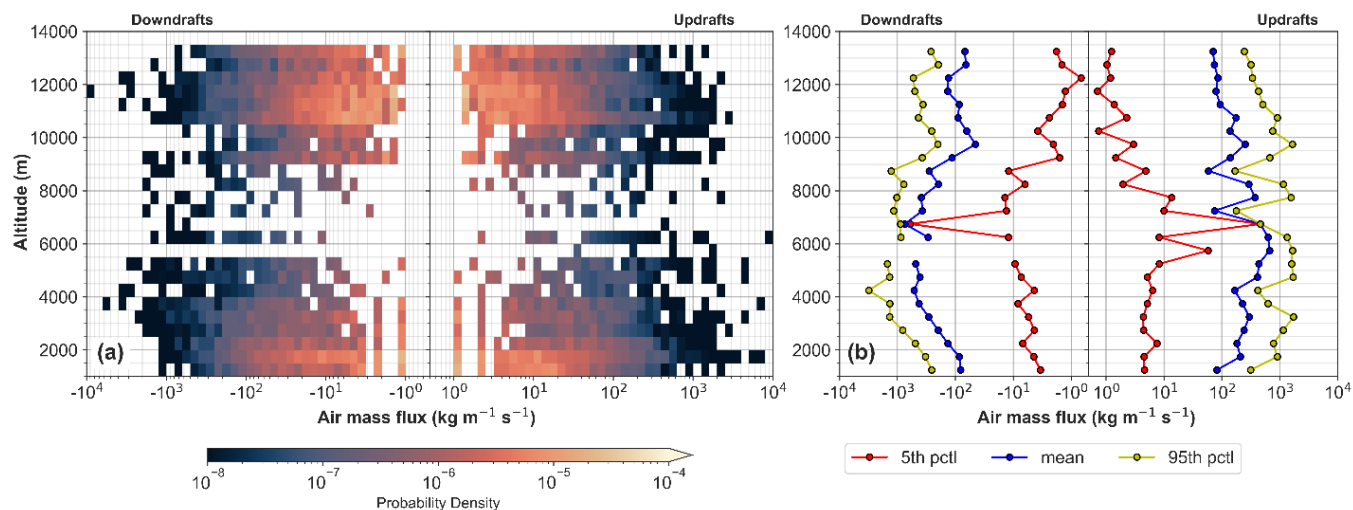

Figure S2: Altitude-wise air mass flux statistics of all in-cloud drafts width > 100 m (a) Probability Density Function (b) mean (blue), 5<sup>th</sup> percentile (red) and 95<sup>th</sup> percentile (yellow) of air mass flux.

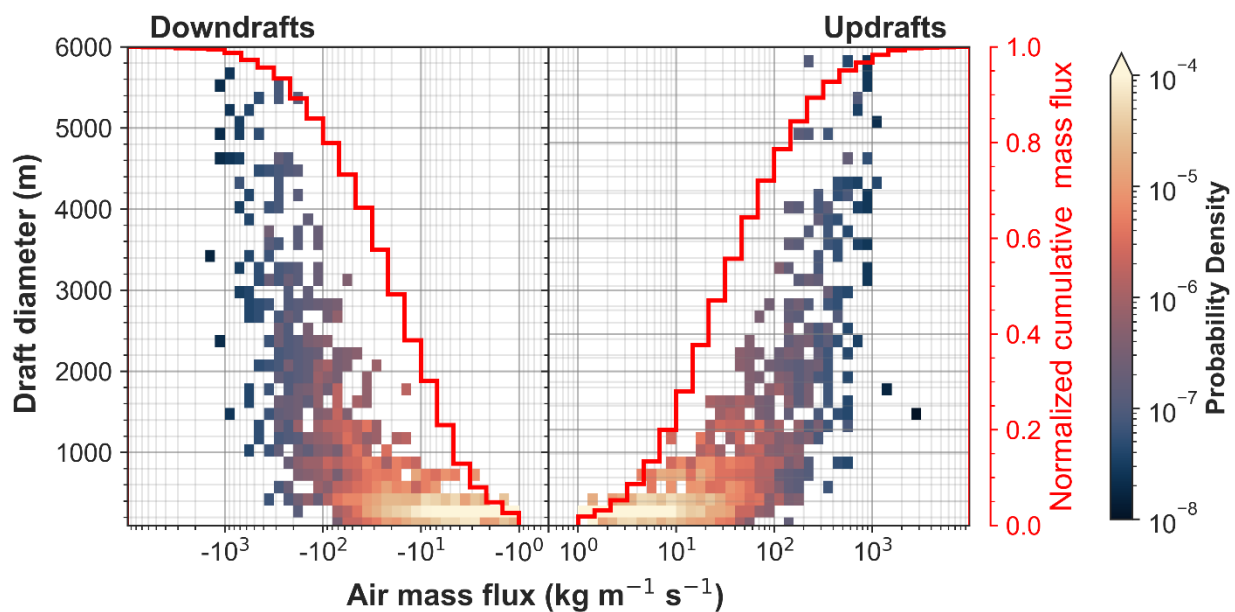

Figure S3: Probability Density of air mass flux vs draft diameter for in-cloud up and downdrafts with width > 100 m at altitudes 10 – 14 km.

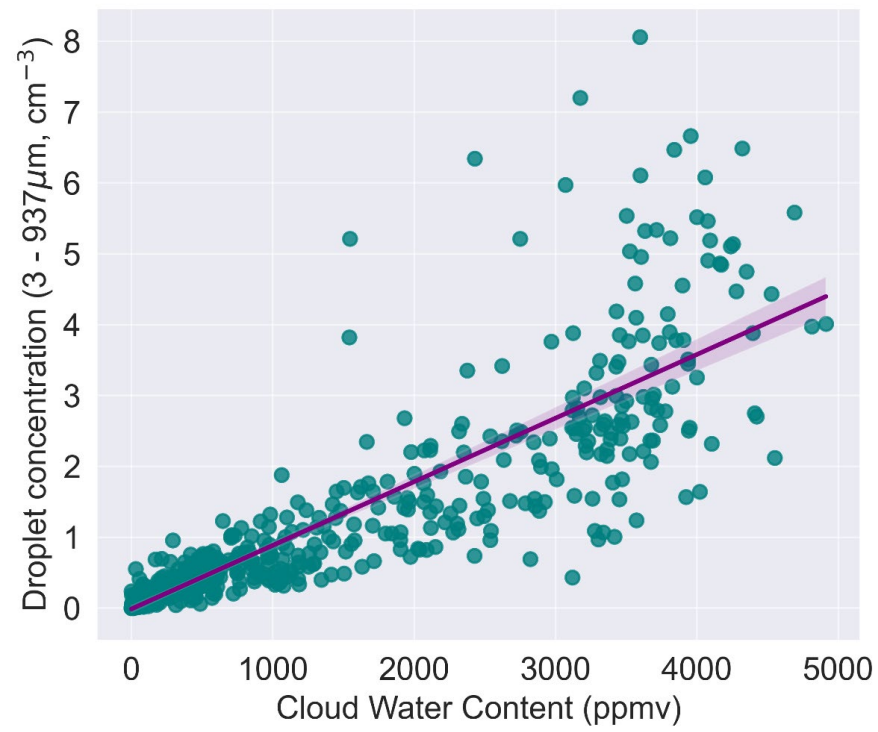

Figure S4: Cloud water content (ppmv) versus droplet number concentration (3 - 937  $\mu\text{m}$ ,  $\text{cm}^{-3}$ ) for upper-levels (10-14 km).
